# Supplementary material
Source: bioRxiv or medRxiv preprint supplement (https://www.biorxiv.org/highwire/filestream/86063/field_highwire_adjunct_files/3/280347-4.pdf)
Supplement: Supplementary file [file 280347-4.pdf]

A

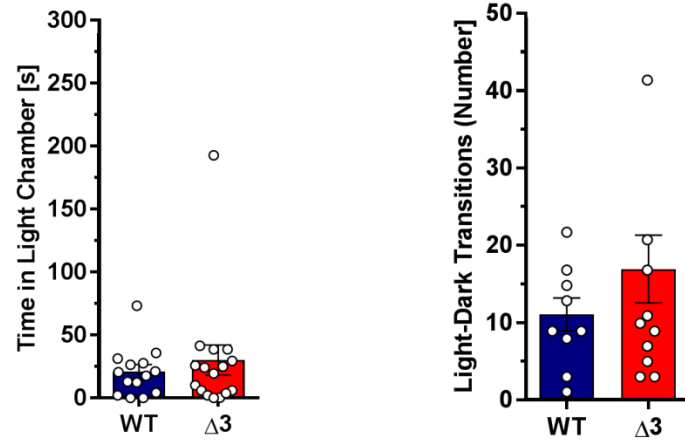

B

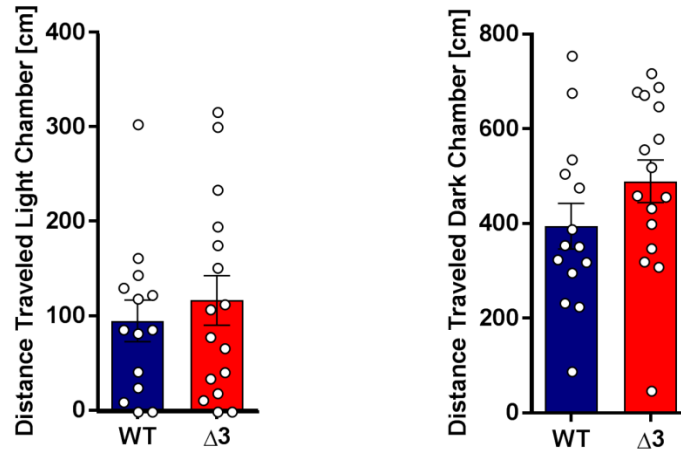

**Supplementary Figure S4.** SNAP25 $\Delta 3$  homozygotes do not display elevated anxiety in the absence of external stressors.
